# Supplementary material for: Quantitative assessment of muscle properties in polymyositis and dermatomyositis using high-frequency ultrasound and shear wave elastography
Source: PubMed Central journal article supplement — Quant Imaging Med Surg. 2022 Nov 22;13(1):428–40. doi: 10.21037/qims-22-423 (PMC9816716; doi:10.21037/qims-22-423), 2022-11-22
Supplement: qims-13-01-428-supplementary.pdf [file qims-13-01-428-supplementary.pdf]

**Table S1** Comparison of muscle thickness, echo intensity, and SWV between patients with PM or DM and healthy controls

|                  | PM and DM            | Healthy controls     | P value* |
|------------------|----------------------|----------------------|----------|
| Thickness (mm)   |                      |                      |          |
| Deltoid          | 19.75 (17.55, 21.30) | 23.00 (20.50, 25.30) | <0.001   |
| Biceps brachii   | 20.45 (16.68, 23.40) | 22.80 (19.70, 23.60) | <0.001   |
| Rectus femoris   | 18.40 (16.60, 19.70) | 20.20 (18.80, 21.00) | <0.001   |
| Vastus lateralis | 20.00 (16.90, 23.00) | 22.80 (20.20, 25.00) | <0.001   |
| Echo intensity   |                      |                      |          |
| Deltoid          | 57.8 (49.1, 71.9)    | 42.0 (38.7, 47.3)    | <0.001   |
| Biceps brachii   | 98.8 (81.9, 112.7)   | 69.8 (64.9, 79.2)    | <0.001   |
| Rectus femoris   | 94.2 (83.4, 105.2)   | 68.8 (64.4, 76.4)    | <0.001   |
| Vastus lateralis | 88.9 (76.3, 99.9)    | 59.3 (53.4, 66.2)    | <0.001   |
| SWV (m/s)        |                      |                      |          |
| Deltoid          | 2.47 (2.23, 2.67)    | 2.57 (2.40, 2.68)    | <0.01    |
| Biceps brachii   | 3.60 (3.23, 4.37)    | 3.67 (3.42, 3.93)    | 0.840    |
| Rectus femoris   | 1.73 (1.50, 1.93)    | 1.87 (1.80, 1.93)    | <0.001   |
| Vastus lateralis | 1.57 (1.43, 1.73)    | 1.77 (1.67, 1.87)    | <0.001   |

Data are shown as median (upper quartile, lower quartile). \*, The difference between the 2 groups was statistically significant according to the Mann-Whitney test. SWV, shear wave velocity; PM, polymyositis; DM, dermatomyositis.

**Table S2** Inter- and intraoperator reproducibility of the SWV measurement in the longitudinal orientation of muscle

|                             | SWV (m/s)         |                   |                   | ICC (95% CI)              |                           |
|-----------------------------|-------------------|-------------------|-------------------|---------------------------|---------------------------|
|                             | Operator A1       | Operator A2       | Operator B        | Interobserver reliability | Intraobserver reliability |
| Deltoid <sup>†</sup>        | 2.42 (2.20, 2.59) | 2.40 (2.16, 2.53) | 2.35 (2.18, 2.53) | 0.964* (0.911-0.985)      | 0.959* (0.901-0.984)      |
| Rectus femoris <sup>†</sup> | 1.82 (1.60, 1.96) | 1.80 (1.55, 1.96) | 1.80 (1.51, 2.00) | 0.988* (0.971-0.995)      | 0.974* (0.908-0.991)      |

\*, P<0.001; †, median (upper quartile, lower quartile); SWV, shear wave velocity; ICC, intraclass correlation coefficient; CI, confidence interval.

**Table S3** Comparison of muscle thickness, echo intensity, and SWV between the healthy controls, the acute stage group, and the chronic stage group

|                       | Healthy controls     | Acute stage group                 | Chronic stage group                | P value* |
|-----------------------|----------------------|-----------------------------------|------------------------------------|----------|
| <b>Thickness (mm)</b> |                      |                                   |                                    |          |
| Deltoid               | 23.00 (20.50, 25.30) | 22.85 (20.53, 24.70)              | 18.10 <sup>†§</sup> (16.60, 19.83) | <0.01    |
| Biceps brachii        | 22.80 (19.70, 23.60) | 23.60 <sup>†</sup> (22.80, 24.90) | 17.60 <sup>†§</sup> (15.00, 20.53) | <0.01    |
| Rectus femoris        | 20.20 (18.80, 21.00) | 20.05 (18.70, 22.75)              | 17.05 <sup>†§</sup> (15.80, 18.60) | <0.01    |
| Vastus lateralis      | 22.80 (20.20, 25.00) | 22.55 (20.08, 23.95)              | 18.45 <sup>†§</sup> (16.20, 21.63) | <0.01    |
| <b>Echo intensity</b> |                      |                                   |                                    |          |
| Deltoid               | 42.0 (38.7, 47.3)    | 55.3 <sup>†</sup> (42.9, 59.6)    | 64.3 <sup>†§</sup> (50.0, 78.9)    | <0.01    |
| Biceps brachii        | 69.8 (64.9, 79.2)    | 90.6 <sup>†</sup> (78.7, 103.6)   | 102.9 <sup>†§</sup> (86.7, 119.1)  | <0.01    |
| Rectus femoris        | 68.8 (64.4, 76.4)    | 86.4 <sup>†</sup> (79.9, 101.3)   | 96.2 <sup>†§</sup> (84.7, 108.0)   | <0.01    |
| Vastus lateralis      | 59.3 (53.4, 66.2)    | 85.4 <sup>†</sup> (64.9, 94.7)    | 90.1 <sup>†§</sup> (80.4, 105.7)   | <0.01    |
| <b>SWV (m/s)</b>      |                      |                                   |                                    |          |
| Deltoid               | 2.57 (2.40, 2.68)    | 2.35 <sup>†</sup> (2.20, 2.54)    | 2.52 <sup>§</sup> (2.27, 2.75)     | <0.01    |
| Biceps brachii        | 3.67 (3.42, 3.93)    | 3.49 (3.20, 4.00)                 | 3.74 (3.26, 4.56)                  | <0.01    |
| Rectus femoris        | 1.87 (1.80, 1.93)    | 1.69 <sup>†</sup> (1.53, 1.83)    | 1.80 (1.50, 2.00)                  | <0.01    |
| Vastus lateralis      | 1.77 (1.67, 1.87)    | 1.69 <sup>†</sup> (1.52, 1.83)    | 1.53 <sup>†§</sup> (1.39, 1.70)    | <0.01    |

Data are shown as median (upper quartile, lower quartile). \*, The difference between the 3 groups was statistically significant based on the Kruskal-Wallis test. The Bonferroni method was used to adjust the test levels for post hoc pairwise comparisons (A P<sup>†</sup> value less than 0.05/3 indicated a statistically significant difference). <sup>†, ‡, §</sup> Post hoc pairwise comparisons, the difference was statistically significant, and all P<sup>†</sup><0.01. <sup>†</sup>, Comparison between the healthy controls and the acute stage group; <sup>‡</sup>, Comparison between the healthy controls and the chronic stage group; <sup>§</sup>, Comparison between the acute stage group and the chronic stage group. SWV, shear wave velocity.
